# Supplementary material for: Automated quantification of myocardial tissue characteristics from native T1 mapping using neural networks with uncertainty-based quality-control
Source: Springer Nature journal article supplement (doi:10.1186/s12968-020-00650-y), 2020-01-01

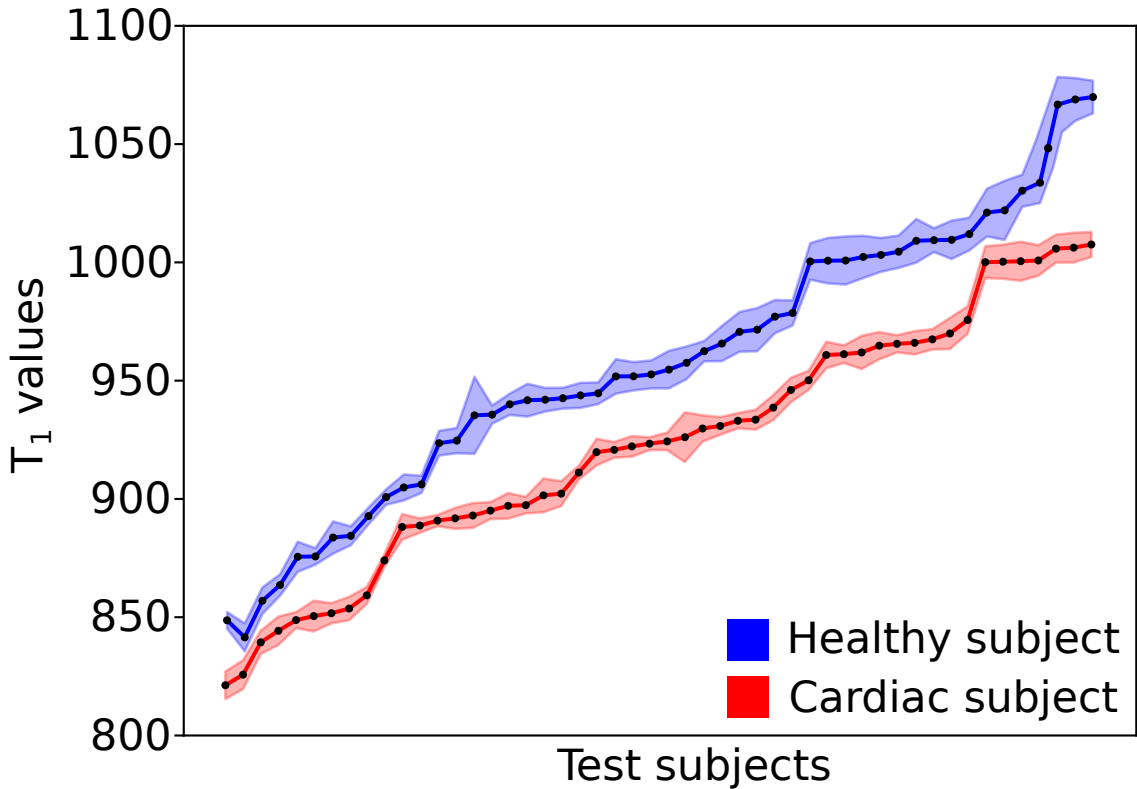

Supplement: MOESM3 [file 18297568]
